# Supplementary material for: Clinical evaluation and mutational analysis of GALK and GALE genes in patients with galactosemia in Greece: one novel mutation and two rare cases
Source: publisher site journal article supplement (doi:10.1515/jpem-2017-0065), 2017-01-01
Supplement: Supplementary file 1 [file jpem-2017-0065_suppl.xlsx]

## Sheet: GALE
GALE	primer location	FORWARD PRIMER name	FORWARD PRIMER (5-3)	primer location	REVERSE PRIMER name	REVERSE PRIMER (5-3)	AMPLICON LENTH (bp)
GALE	c.122-77 -c.122-55	GALEx4F	GACTAGCCAGACACACATTCCC	c.-5-31 - c.-5-10	GALEx4R	GCCACCTCTGAGACTCTGTATC	258
NM_000403.3	c.238-62-c.238-42	GALEx5F	TCCTTGGCAATGCCCTCAGC	c.122-47 - c.122-27	GALEx5R	CACAGCACCCCATGTCGTGAT	505
	c.351+70 -c.351+90	GALEx6F	AGCTTGGGCTCTGTGTTTGG	c.238-59-c.238-39	GALEx6R	GAGGGCATTGCCAAGGACTAA	262
	c.528+32-c.528+54	GALEx7F	CCTGAGGAGTCCATCGATCAGT	c.352-44-c.352-24	GALEx7R	AATGTGTGAGGCAGAGGTCAC	274
	c.731(p.244)-c.750(p.250)	GALEx8_9F	CCCTTGGCCAGATCCACGA	c.529-84-c.529-64	GALEx8_9R	AGAATAGGCATGAGGAGGGCT	489
	c.873+64-c.873+85	GALEx10_11F	GTGAGTGGGAAGGGCCAAAGC	c.662(P.221)-c.684(P.228)	GALEx10_11R	AGGCCCTGAATGTCTTTGGCAAT	499
	c.*10-c.*34	GALEx12_13F	CTGCTTTTCCTGGTCCTTGGTAGG	c.873+85-c.873+106	GALEx12_13R	CTCTCTGGAGGGTACCTGGCAC	509
	c.*179-c.*206	GALEx13F	CCTGTGGAAGATAAGAGTTAGAGACCT	c.989-10-c.998(p.333)	GALEx13R	CGTGTTGCAGGTGAGGATCT	274

## Sheet: GALK1
PRIMER NAME	5-3 SEQUENCE	AMPLICON LENGTH (bp)	POSITION
GALK1x1FW	CACATCTCCCGCGGGAAGAAC	493	c.165+86-c.165+108
GALK1x1RV	TATCCCACCCGGCACCATTAG		c.-222-c.-202
GALK1x2FW	GTATCAGACAAATGAATGGGCTCTGT	507	c.355+60-c.355+86
GALK1x2RV	CAGAGTCCAGGTCTGTGCTCCAG		c.166-232-c.166-210
GALK1x3FW	GGAGGCTAGGGCTGGTGGAA	496	c.476-41-c.476-21
GALK1x3RV	GCCCTAAACCAGGAGGACAATTAG		c.356-227-c.356-204
GALK1x4FW	AAGCGTGTGCTTGCTGCG	502	c.612-54-c.612-36
GALK1x4RV	CTTCAGTGCAGTGGTGGTCAGC		c.372 (p.124)-c.393 (p.131)
GALK1x5FW	TGGCAGAAGGCCCTGGAGATC	491	c.793+87-c.793+108
GALK1x5RV	ATGCCCTGTGGCATCATGGAC		c.538 (p.180)-c.558 (p.186)
GALK1x6FW	AGTCGTCTCTGCAGAGAGGATA	496	c.945-14-c.953 (p.317)
GALK1x6RV	TCACCTTGGAAAGCATGGAGTGTT		c.794-261-c.794-238
GALK1x7FW	GTAGAAGGTGGCAGTCCCGC	498	c.1118 (p.873) - c.1138 (p.380)
GALK1x7RV	CAGGGACCTGGTGAGCAAAGA		c.798 (p.266)- c.818 (p.273)
GALK1x8FW	ACCCAGCCTTTGTTCTGCACTTAA	498	c.*259-c.*283
GALK1x8RV	GTGGCTGCACGGTGACACT		c.1046 (p.349)-c.1064 (p.351)
